# Supplementary material for: Daily corticosterone rhythm modulates pineal function through NFκB-related gene transcriptional program
Source: PubMed Central journal article supplement (PMC5437068; doi:10.1038/s41598-017-02286-y), 2017-05-18
Supplement: 41598_2017_2286_MOESM1_ESM.pdf [file 41598_2017_2286_MOESM1_ESM.pdf]

## Daily corticosterone rhythm modulates pineal function through NFκB-related gene transcriptional program

Sanseray da Silveira Cruz-Machado; Eduardo K. Tamura; Claudia E. Carvalho-Sousa; Vanderlei Amadeu Rocha; Luciana Pinato; Pedro A. C. Fernandes; Regina P. Markus.

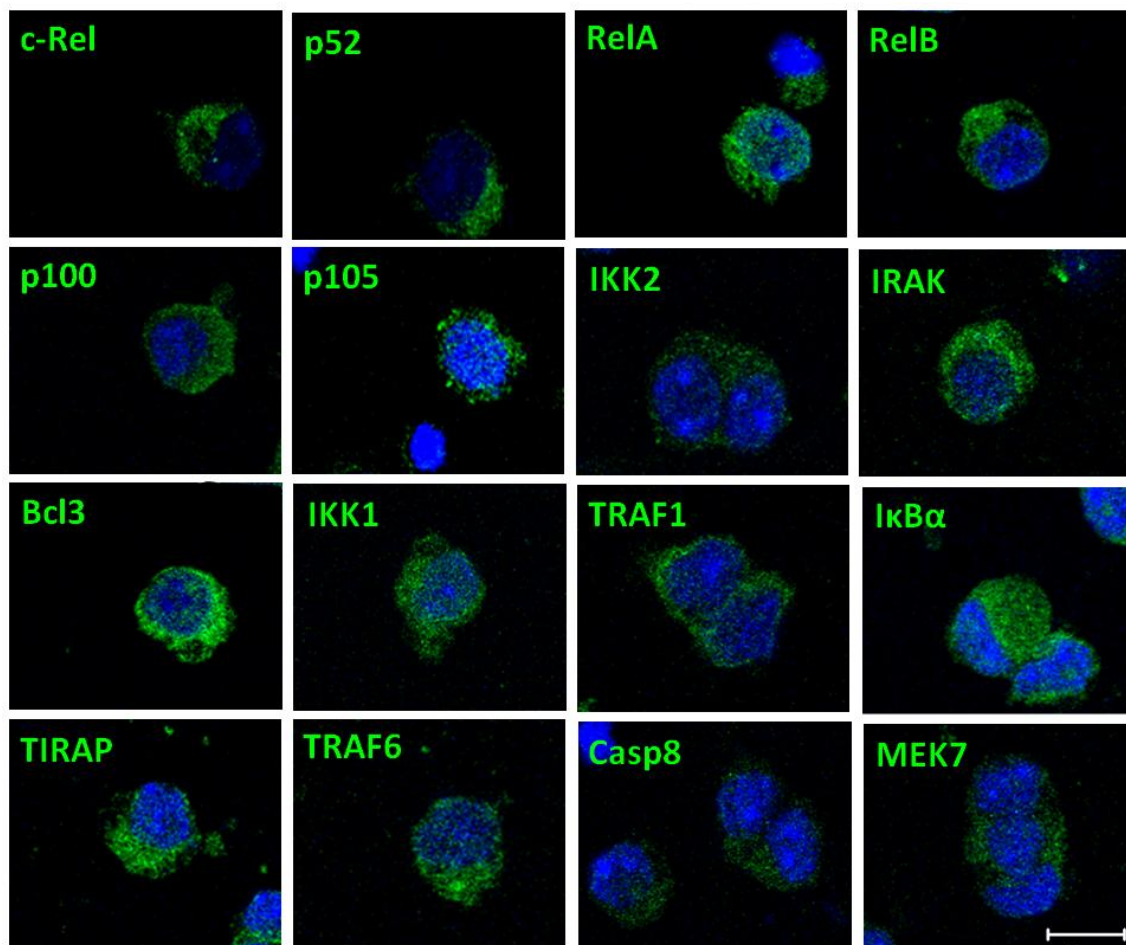

**Suppl. Fig. 1 – Pinealocyte expresses 16 proteins related to NFκB signaling pathway.** Cells were observed by confocal microscopy. Green staining represents the fluorescence from FITC and blue staining represents the fluorescence from DAPI, a nuclear marker. Scale bar: 10 μm.

**A**

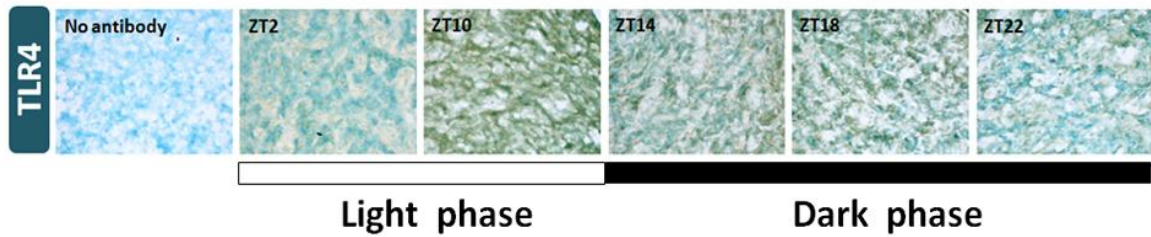

**B**

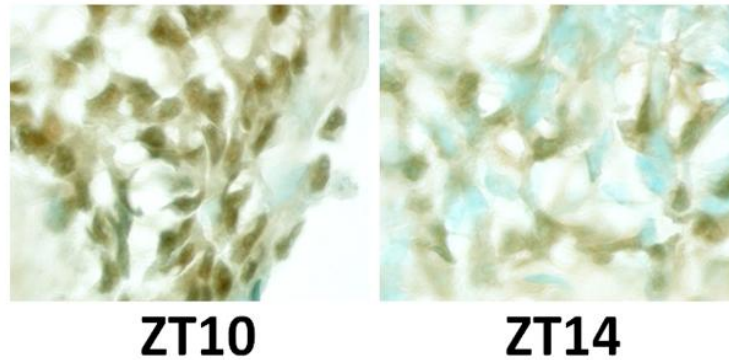

**Suppl. Fig. 2 – Expression of TLR4 protein in cryosections from rat pineal glands.** Bright-field photomicrograph shows part of pineal parenchyma demonstrating diffuse presence of TLR4 expression during light (ZT2, ZT10) or dark phases (ZT14, ZT18, ZT22) (20x objective). Note that stronger immunoreactivity for TLR4 occurred at ZT10 (end of light phase). B) Higher magnification of TLR4-positive cells in the rat pineal gland at ZT10 and ZT14 (100x objective). For negative controls, no primary antibody was incubated.

**Supplementary table 1** – List of genes evaluated in the qPCR array profiler Rat TLR signaling pathway (PARN-018A, SABioscience, Frederick, MD, USA) including the GeneBank access number, symbols, gene names and aliases.

| <b>GenBank</b>      | <b>Symbol</b> | <b>Gene name</b>                                                           | <b>Aliases</b>                    |
|---------------------|---------------|----------------------------------------------------------------------------|-----------------------------------|
| <b>NM_001007798</b> | <i>Btk</i>    | Bruton agammaglobulinemia tyrosine kinase                                  | -                                 |
| <b>NM_022277</b>    | <i>Casp8</i>  | Caspase 8                                                                  | -                                 |
| <b>NM_031530</b>    | <i>Ccl2</i>   | Chemokine (C-C motif) ligand 2                                             | MCP-1, Scya2, Sigje               |
| <b>NM_021744</b>    | <i>Cd14</i>   | CD14 molecule                                                              | -                                 |
| <b>NM_012926</b>    | <i>Cd80</i>   | Cd80 molecule                                                              | B7-1                              |
| <b>NM_020081</b>    | <i>Cd86</i>   | CD86 molecule                                                              | B7-2                              |
| <b>NM_024125</b>    | <i>Cebpb</i>  | CCAAT/enhancer binding protein (C/EBP), beta                               | Il6dbp, LAP, NF-IL6, TCF5         |
| <b>NM_001107588</b> | <i>Chuk</i>   | Conserved helix-loop-helix ubiquitous kinase                               | -                                 |
| <b>NM_001005897</b> | <i>Clec4e</i> | C-type lectin domain family 4, member e                                    | Clecsf9, Mincle                   |
| <b>NM_053852.1</b>  | <i>Csf2</i>   | Colony stimulating factor 2 (granulocyte-macrophage)                       | Gm-csf, Gmcsf                     |
| <b>NM_017104</b>    | <i>Csf3</i>   | Colony stimulating factor 3 (granulocyte)                                  | -                                 |
| <b>NM_139089</b>    | <i>Cxcl10</i> | Chemokine (C-X-C motif) ligand 10                                          | IP-10, Scyb10                     |
| <b>NM_152937</b>    | <i>Fadd</i>   | Fas (TNFRSF6)-associated via death domain                                  | Mort1                             |
| <b>NM_022197</b>    | <i>Fos</i>    | FBJ osteosarcoma oncogene                                                  | c-fos                             |
| <b>NM_012963</b>    | <i>Hmgb1</i>  | High mobility group box 1                                                  | Ac2-008, Hmg1, MGC93598, MGC93599 |
| <b>NM_001098241</b> | <i>Hras</i>   | Harvey rat sarcoma virus oncogene                                          | HRAS1, c-H-ras                    |
| <b>NM_031971</b>    | <i>Hspa1a</i> | Heat shock 70kD protein 1A                                                 | HSP72, Hsp70-1, Hspa1, Hspa1b     |
| <b>NM_022229</b>    | <i>Hspd1</i>  | Heat shock protein 1 (chaperonin)                                          | Hsp60, Hspd1-30p                  |
| <b>NM_001014786</b> | <i>Ifna1</i>  | Interferon-alpha 1                                                         | IFN-alpha1                        |
| <b>NM_019127</b>    | <i>Ifnb1</i>  | Interferon beta 1, fibroblast                                              | Ifnb                              |
| <b>NM_138880</b>    | <i>Ifng</i>   | Interferon gamma                                                           | IFNG2                             |
| <b>NM_053355</b>    | <i>Ikbkb</i>  | Inhibitor of kappa light polypeptide gene enhancer in B-cells, kinase beta | AIM-1, IKK2                       |
| <b>NM_012854</b>    | <i>Il10</i>   | Interleukin 10                                                             | IL10X                             |
| <b>NM_053390</b>    | <i>Il12a</i>  | Interleukin 12a                                                            | -                                 |
| <b>NM_017019</b>    | <i>Il1a</i>   | Interleukin 1 alpha                                                        | IL-1 alpha                        |
| <b>NM_031512</b>    | <i>Il1b</i>   | Interleukin 1 beta                                                         | -                                 |
| <b>NM_013123</b>    | <i>Il1r1</i>  | Interleukin 1 receptor, type I                                             | -                                 |
| <b>NM_053836</b>    | <i>Il2</i>    | Interleukin 2                                                              | -                                 |
| <b>NM_012589</b>    | <i>Il6</i>    | Interleukin 6                                                              | ILg6, Ifnb2                       |
| <b>NM_017020</b>    | <i>Il6r</i>   | Interleukin 6 receptor                                                     | IL6R1, Il6ra                      |
| <b>NM_001127555</b> | <i>Irak1</i>  | Interleukin-1 receptor-associated kinase 1                                 | RGD1563841                        |
| <b>NM_001025422</b> | <i>Irak2</i>  | Interleukin-1 receptor-associated kinase 2                                 | -                                 |
| <b>NM_012591</b>    | <i>Irf1</i>   | Interferon regulatory factor 1                                             | -                                 |
| <b>NM_001006969</b> | <i>Irf3</i>   | Interferon regulatory factor 3                                             | MGC94729                          |
| <b>NM_021835</b>    | <i>Jun</i>    | Jun proto-oncogene                                                         | -                                 |
| <b>NM_145095</b>    | <i>Kcnh8</i>  | Potassium voltage-gated channel, subfamily H (eag-related), member 8       | ELK3, Elk1, Ets-1                 |
| <b>NM_001106786</b> | <i>Tbk1</i>   | TANK-binding kinase 1                                                      | -                                 |
| <b>NM_001097582</b> | <i>Tlr7</i>   | Toll-like receptor 7                                                       | RGD1563357                        |
| <b>NM_080769</b>    | <i>Lta</i>    | Lymphotoxin alpha (TNF superfamily,                                        | Tnfb                              |

|                       |                 |                                                                                     |                                    |
|-----------------------|-----------------|-------------------------------------------------------------------------------------|------------------------------------|
|                       |                 | member 1)                                                                           |                                    |
| <b>NM_001106405</b>   | <i>Cd180</i>    | CD180 molecule                                                                      | Ly78                               |
| <b>NM_001024279</b>   | <i>Ly96</i>     | Lymphocyte antigen 96                                                               | MD-2                               |
| <b>NM_012798</b>      | <i>Mal</i>      | Mal, T-cell differentiation protein                                                 | MALGENE                            |
| <b>NM_001100674</b>   | <i>Map2k3</i>   | Mitogen activated protein kinase kinase 3                                           | -                                  |
| <b>NM_001030023</b>   | <i>Map2k4</i>   | Mitogen activated protein kinase kinase 4                                           | MKK4                               |
| <b>NM_053887</b>      | <i>Map3k1</i>   | Mitogen activated protein kinase kinase 1                                           | Mekk1                              |
| <b>NM_001107920</b>   | <i>Map3k7</i>   | Mitogen activated protein kinase kinase 7                                           | Tak1                               |
| <b>NM_001106904.1</b> | <i>Map4k4</i>   | Mitogen-activated protein kinase kinase kinase 4                                    | -                                  |
| <b>NM_053829.1</b>    | <i>Mapk8</i>    | Mitogen-activated protein kinase 8                                                  | JNK                                |
| <b>NM_001100673</b>   | <i>Mapk8ip3</i> | Mitogen-activated protein kinase 8 interacting protein 3                            | JIP3, JSAP1                        |
| <b>NM_017322</b>      | <i>Mapk9</i>    | Mitogen-activated protein kinase 9                                                  | SAPK                               |
| <b>NM_198130</b>      | <i>Myd88</i>    | Myeloid differentiation primary response gene 88                                    | -                                  |
| <b>NM_001276711.1</b> | <i>Nfkb1</i>    | Nuclear factor of kappa light polypeptide gene enhancer in B-cells 1                | NF-kB                              |
| <b>NM_001105720</b>   | <i>Nfkbia</i>   | Nuclear factor of kappa light polypeptide gene enhancer in B-cells inhibitor, alpha | RL, IF-1                           |
| <b>NM_030867</b>      | <i>Nfkbib</i>   | Nuclear factor of kappa light polypeptide gene enhancer in B-cells inhibitor, beta  | MGC93398                           |
| <b>NM_212509</b>      | <i>Nfkbil1</i>  | Nuclear factor of kappa light polypeptide gene enhancer in B-cells inhibitor-like 1 | -                                  |
| <b>NM_001108133</b>   | <i>Nfrkb</i>    | Nuclear factor related to kappa B binding protein                                   | -                                  |
| <b>NM_017323</b>      | <i>Nr2c2</i>    | Nuclear receptor subfamily 2, group C, member 2                                     | Tr4                                |
| <b>NM_001100565</b>   | <i>Peli1</i>    | Pellino 1                                                                           | -                                  |
| <b>NM_053373</b>      | <i>Pglyrp1</i>  | Peptidoglycan recognition protein 1                                                 | Pglyrp, Pgrp                       |
| <b>NM_013196</b>      | <i>Ppara</i>    | Peroxisome proliferator activated receptor alpha                                    | PPAR                               |
| <b>NM_019335</b>      | <i>Eif2ak2</i>  | Eukaryotic translation initiation factor 2-alpha kinase 2                           | Pkr, Prkr                          |
| <b>NM_017232</b>      | <i>Ptgs2</i>    | Prostaglandin-endoperoxide synthase 2                                               | COX-2, Cox2                        |
| <b>XM_223688</b>      | <i>Rel</i>      | V-rel reticuloendotheliosis viral oncogene homolog (avian)                          | -                                  |
| <b>NM_199267</b>      | <i>Rela</i>     | V-rel reticuloendotheliosis viral oncogene homolog A (avian)                        | NFkB                               |
| <b>NM_001008349</b>   | <i>Nfkb2</i>    | Nuclear factor of kappa light polypeptide gene enhancer in B-cells 2, p49/p100      | MGC93816, RGD1307189               |
| <b>NM_001191865.1</b> | <i>Ripk2</i>    | Receptor-interacting serine-threonine kinase 2                                      | -                                  |
| <b>NM_053588</b>      | <i>Rnf138</i>   | Ring finger protein 138                                                             | MGC72355, Rsd4, Trif               |
| <b>NM_001105817</b>   | <i>Sarm1</i>    | Sterile alpha and TIR motif containing 1                                            | -                                  |
| <b>NM_001108890</b>   | <i>Ticam2</i>   | Toll-like receptor adaptor molecule 2                                               | -                                  |
| <b>NM_001172120</b>   | <i>Tlr1</i>     | Toll-like receptor 1                                                                | -                                  |
| <b>NM_198769</b>      | <i>Tlr2</i>     | Toll-like receptor 2                                                                | -                                  |
| <b>NM_198791</b>      | <i>Tlr3</i>     | Toll-like receptor 3                                                                | -                                  |
| <b>NM_019178</b>      | <i>Tlr4</i>     | Toll-like receptor 4                                                                | -                                  |
| <b>NM_001145828</b>   | <i>Tlr5</i>     | Toll-like receptor 5                                                                | -                                  |
| <b>NM_207604</b>      | <i>Tlr6</i>     | Toll-like receptor 6                                                                | -                                  |
| <b>NM_198131</b>      | <i>Tlr9</i>     | Toll-like receptor 9                                                                | -                                  |
| <b>NM_012675</b>      | <i>Tnf</i>      | Tumor necrosis factor (TNF superfamily, member 2)                                   | MGC124630, RATTNF, TNF-alpha, Tnfa |
| <b>NM_013091</b>      | <i>Tnfrsf1a</i> | Tumor necrosis factor receptor                                                      | MGC105478, Tnfr1                   |

|                       |               |                                                            |                              |
|-----------------------|---------------|------------------------------------------------------------|------------------------------|
|                       |               | superfamily, member 1a                                     |                              |
| <b>NM_001024771</b>   | <i>Tnip2</i>  | TNFAIP3 interacting protein 2                              | -                            |
| <b>NM_001109668</b>   | <i>Tollip</i> | Toll interacting protein                                   | -                            |
| <b>NM_001100480</b>   | <i>Tradd</i>  | TNFRSF1A-associated via death domain                       | -                            |
| <b>NM_001107754</b>   | <i>Traf6</i>  | Tnf receptor-associated factor 6                           | -                            |
| <b>NM_053928</b>      | <i>Ube2n</i>  | Ubiquitin-conjugating enzyme E2N<br>(UBC13 homolog, yeast) | MGC93937                     |
| <b>NM_001110345.2</b> | <i>Ube2v1</i> | Ubiquitin-conjugating enzyme E2<br>variant 1               | -                            |
| <b>NM_001007604</b>   | <i>Rplp1</i>  | Ribosomal protein, large, P1                               | MGC72935                     |
| <b>NM_012583</b>      | <i>Hprt1</i>  | Hypoxanthine<br>phosphoribosyltransferase 1                | Hgpptase, Hprt,<br>MGC112554 |
| <b>NM_173340</b>      | <i>Rpl13a</i> | Ribosomal protein L13A                                     | -                            |
| <b>NM_017025</b>      | <i>Ldha</i>   | Lactate dehydrogenase A                                    | Ldh1                         |
| <b>NM_031144</b>      | <i>Actb</i>   | Actin, beta                                                | Actx                         |

**Supplementary table 2** – List of antibodies, specification, manufacturer and dilution used for the immunofluorescence assay presented in supplemental figure 1.

| <b>Antibody</b> | <b>Specification</b> | <b>Manufacturer</b>                 | <b>Dilution</b> |
|-----------------|----------------------|-------------------------------------|-----------------|
| NFκB p65 (RelA) | Rabbit polyclonal    | Santa Cruz Biotechnology (sc-372x)  | 1:100           |
| NFκB RelB       | Rabbit polyclonal    | Santa Cruz Biotechnology (sc-226x)  | 1:200           |
| NFκB c-Rel      | Rabbit polyclonal    | Santa Cruz Biotechnology (sc-70x)   | 1:100           |
| NFκB p52        | Rabbit polyclonal    | Santa Cruz (sc-298x)                | 1:100           |
| NFκB p100/p52   | Rabbit polyclonal    | Abcam (AB7972)                      | 1:100           |
| NFκB p105/p50   | Rabbit polyclonal    | Abcam (AB7971)                      | 1:100           |
| Bcl3            | Rabbit polyclonal    | Santa Cruz Biotechnology (sc-185x)  | 1:300           |
| IKK1            | Rabbit polyclonal    | Santa Cruz Biotechnology (sc-7218)  | 1:100           |
| IKK2            | Rabbit polyclonal    | Abcam (AB59195)                     | 1:100           |
| IRAK            | Rabbit polyclonal    | Abcam (AB238)                       | 1:50            |
| TIRAP           | Rabbit polyclonal    | Santa Cruz Biotechnology (sc-28822) | 1:50            |
| TRAF6           | Rabbit monoclonal    | Merck Milipore (04-452)             | 1:50            |
| TRAF1           | Rabbit polyclonal    | Santa Cruz Biotechnology (sc-7186)  | 1:50            |
| IκB-alpha       | Rabbit polyclonal    | Santa Cruz Biotechnology (sc-371)   | 1:100           |
| Caspase 8       | Rabbit polyclonal    | Novus Biologicals (NBP1-05123)      | 1:50            |

|      |                   |                    |      |
|------|-------------------|--------------------|------|
| MEK7 | Rabbit monoclonal | Abcam<br>(AB52618) | 1:50 |
|------|-------------------|--------------------|------|
